1 Divergent inflammatory and neurology-related plasma protein profiles in individuals with  
2 long COVID following primary and breakthrough SARS-CoV-2 infections.

3

4 Amit Bansal<sup>1,2\*</sup>, Sam W.Z. Olechnowicz,<sup>3,4\*</sup> Nicholas Kiernan-Walker<sup>4,5</sup>, Jacob  
5 Cumming<sup>5,6,7</sup>, Ramin Mazhari<sup>4,5</sup>, COVID PROFILE consortium<sup>5&</sup>, Rebecca J. Cox<sup>1,8</sup>, Ivo  
6 Mueller<sup>4,5</sup>, Rory Bowden<sup>3,4,5,\$#</sup> and Emily M. Eriksson<sup>4,5\$#</sup>

7

8 \* Equal Contribution

9 \$ Co-senior authors

10

11 &COVID PROFILE Consortium Investigators: Siavash Foroughi<sup>1,2</sup>, Jason A. Tye-  
12 Din<sup>1,2,3,4</sup>, Anna K. Coussens<sup>1,2,5</sup> and Vanessa L. Bryant<sup>1,2,6</sup>

13

14 1. Influenza Centre, Department of Clinical Science, University of Bergen, Bergen, Norway

15 2. Department of Infectious Diseases, The University of Melbourne, at the Peter Doherty  
16 Institute for Infection and Immunity, Melbourne, Australia

17 3. The Walter and Eliza Hall Institute of Medical Research, Advanced Technology and  
18 Biology Division, Melbourne, Australia

19 4. The University of Melbourne, Department of Medical Biology, Melbourne, Australia

20 5. The Walter and Eliza Hall Institute of Medical Research, Population Health and  
21 Immunity Division, Melbourne, Australia

22 6. Disease Elimination Program, Burnet Institute, Melbourne, Australia

23 7. The University of Melbourne, Department of Mathematics and Statistics, Melbourne,  
24 Australia

25 8. Department of Microbiology, Haukeland University Hospital, Bergen, Norway

26

27 # Corresponding Authors:

28 Emily M. Eriksson

29 The Walter and Eliza Hall Institute of Medical Research

30 1G Royal Parade, Parkville, VIC 3052 Australia

31 Tel: +61 3 93452870

32 email: [eriksson@wehi.edu.au](mailto:eriksson@wehi.edu.au)

33 ORCID # 0000-0002-7851-973X

34

35 Rory Bowden

36 The Walter and Eliza Hall Institute of Medical Research

37 1G Royal Parade, Parkville, VIC 3052 Australia

38 Tel: +61 3 93452762

39 email: [bowden.r@wehi.edu.au](mailto:bowden.r@wehi.edu.au)

40 ORCID # 0000-0001-8596-0366

41

42

43

44

45 **Abstract**

46 Long COVID is a complex condition where symptoms persist for more than 3 months after  
47 SARS-CoV-2 infection and affects an estimated 5-30% of individuals. While the  
48 pathobiology of long COVID is still evolving, persistent inflammation has emerged as an  
49 important feature of this condition. However, it is unclear if immune responses from  
50 COVID-19 vaccination or SARS-CoV-2 re-infection exacerbate or mirror the initial  
51 inflammatory responses. To address this question, we quantified 182 inflammatory and  
52 neurology-related proteins in plasma using multiplexed affinity proteomics. Plasma  
53 samples were collected 6-9 months after first infection, but before COVID-19 vaccination  
54 from individuals who had recovered from COVID-19 (n=21) or from individuals with long  
55 COVID (n=12). This was benchmarked against plasma from unvaccinated, SARS-CoV-2  
56 naive individuals (n=24). In addition to this cross-sectional analysis, we performed  
57 longitudinal analysis in a subset of individuals (n=34), where paired samples collected 2-  
58 4 weeks after a third COVID-19 vaccine dose and after SARS-CoV-2 breakthrough  
59 infection were available. Boruta feature selection and lasso regression models identified  
60 a distinct plasma profile in long COVID individuals, characterised by elevated IL-20,  
61 HAGH, NAAA, CLEC10A, LXN, and MCP-1 and reduced TRAIL, G-CSF, NBL1, and  
62 CCL23 protein concentrations. Notably, longitudinal analysis demonstrated that neither  
63 COVID-19 booster vaccination nor breakthrough infection replicated inflammatory and  
64 neurology-related plasma protein profiles observed after primary infection suggesting an  
65 altered immune response outcome in individuals with long COVID upon re-exposure.

66

## 67 **Introduction**

68 After initial SARS-CoV-2 infection, a significant proportion of individuals develop  
69 persistent systemic symptoms that may continue for months. This condition is commonly  
70 referred to as long COVID or post-acute sequelae of COVID-19 <sup>1,2</sup>. One of the major  
71 challenges in the field is the insufficient understanding of the underlying pathophysiology  
72 of this condition, coupled with the absence of reliable biomarkers that could be used in  
73 standardised diagnostic tools. Currently, the diagnosis of long COVID is predominantly  
74 based on clinical evaluation. The lack of standardised molecular and quantitative  
75 diagnostic criteria has impeded accurate estimation of long COVID prevalence. However,  
76 available estimates suggest that long COVID affects 10–30% of non-hospitalised  
77 individuals and as many as 50–70% of those who were hospitalised during acute infection  
78 <sup>2,3</sup>. Although COVID-19 vaccination may reduce the risk, the incidence of developing long  
79 COVID post-vaccination is still estimated to be 10–12% <sup>2,4,5</sup>.

80

81 While the precise mechanisms underlying long COVID is poorly understood, distinct  
82 patterns of immune activation have been observed in affected patients and persist several  
83 months after SARS-CoV-2 infection. These patterns are evident both at the cellular level  
84 and through changes in soluble factors in the bloodstream. The latter includes elevated  
85 or altered concentrations of circulating inflammatory mediators<sup>6-9</sup>, complement proteins  
86 <sup>10,11</sup>, and neuro-inflammatory molecules <sup>9,12</sup> and inflammatory markers have been  
87 associated with a range of persistent long COVID symptoms <sup>13</sup>. Collectively, these studies  
88 have provided essential insights into dysregulated processes that may underlie long  
89 COVID. However, many of these long COVID studies have been conducted in

90 populations with high community transmission of SARS-CoV-2 raising concerns about  
91 the potential confounding effects of ongoing viral exposure(s) particularly on inflammatory  
92 biomarker measurements. Moreover, studies that have monitored inflammatory and  
93 neurology plasma protein profiles longitudinally in long COVID individuals remain limited.

94 In this study, we leveraged access to samples collected from an Australian population  
95 with low community transmission during the two first years of the COVID-19 pandemic <sup>14</sup>.  
96 Using a multiplexed affinity proteomics approach, the Olink Target Proximity-Extension  
97 Assay (PEA, Olink) and longitudinal plasma samples from initially SARS-CoV-2 naïve  
98 individuals, COVID-19 recovered and long COVID individuals, we explored inflammatory  
99 and neurology-related plasma protein profiles not only following a primary infection with  
100 the SARS-CoV-2 ancestral strain, but also after COVID-19 booster vaccination and  
101 breakthrough infections. Our study design provided a rare opportunity to understand how  
102 circulating protein profiles after vaccination and re-exposure in the same individual  
103 compare to plasma profiles after primary SARS-CoV-2 infections in long COVID  
104 individuals.

105 We identified 14 top inflammatory and neurology-related proteins that were distinctively  
106 associated with either long COVID or recovery. These included neuroblastoma  
107 suppressor of tumorigenicity 1 (NBL1), interleukin (IL)-20, latexin (LXN), monocyte  
108 chemoattractant protein 1 (MCP-1, CCL2), C-type lectin domain containing 10A  
109 (CLEC10A), chemokine ligand 23 (CCL23), TNF-related apoptosis-inducing ligand  
110 (TRAIL), hydroxyacylglutathione hydrolase (HAGH), granulocyte-colony stimulating  
111 factor (G-CSF), N-acyl ethanolamine- hydrolysing acid amidase (NAAA), artemin (ARTN),

112 cystatin-D (CST5), fibroblast growth factor 19 (FGF-19), and delta and notch-like  
113 epidermal growth factor-related receptor (DNER). Notably, long COVID patients exhibited  
114 plasma profiles with atypical levels of these proteins, suggestive of ongoing dysregulated  
115 processes 6-9 months post-infection. Longitudinal analysis revealed partial resolution of  
116 elevated plasma protein levels following COVID-19 booster vaccination, but notably,  
117 inflammatory and neurology-related protein patterns observed after primary infection  
118 were not replicated following a subsequent breakthrough infection. Our analyses provide  
119 pivotal understanding of vaccine-associated and subsequent SARS-CoV-2 infection-  
120 induced responses in long COVID individuals and suggests that there is an altered  
121 immune response outcome in these individuals upon re-infection without features of  
122 dysregulation.

123

## 124 **Methods**

### 125 **COVID PROFILE study cohort and samples**

126 Plasma was collected as part of COVID PROFILE, a community-based longitudinal cohort  
127 study conducted in Victoria, Australia from October 2020 to April 2023<sup>14</sup>. The study was  
128 approved by the Walter and Eliza Hall Institute (#20/08) and Melbourne Health  
129 (RMH69108) Human Research Ethics Committees. All subjects provided written informed  
130 consent to participate in the study, in accordance with the Declaration of Helsinki.  
131 Participants were enrolled based on SARS-CoV-2 infection status and initially categorised  
132 as COVID-19 recovered or SARS-CoV-2 naïve (confirmed by SARS-CoV-2  
133 PCR/serology and referred to as healthy). Demographic data and detailed clinical  
134 information on COVID-19 symptoms, comorbidities, vaccination and breakthrough  
135 infections were collected at enrolment and during follow-up visits. Primary vaccination  
136 consisted of either two doses of the BNT162b2 mRNA vaccine (COMIRNATY,  
137 Pfizer/BioNTech), or ChAdOx1 adenoviral vectored vaccine (Oxford-AstraZeneca),  
138 followed by a third mRNA vaccine consisting of either BNT162b2 or mRNA-1273  
139 (Moderna Tx Spikevax). Due to emergence of the long COVID condition, additional follow-  
140 up surveys were conducted to identify participants that were experiencing long COVID.  
141 These surveys collected comprehensive information on symptom duration and individuals  
142 with long COVID were identified in accordance with WHO definition: symptoms persisting  
143 or new symptoms 3 months after the initial SARS-CoV-2 infection, with these symptoms  
144 lasting for at least 2 months with no other explanation<sup>1</sup>. All other participants experienced  
145 COVID-19 symptoms that lasted <90 days post-diagnosis and were classified as COVID-  
146 19 recovered. Plasma collected at enrolment for healthy (n = 24) and 6-9 months after

147 primary COVID-19 diagnosis for COVID-19 recovered (n = 21) and long COVID  
148 individuals (n = 12) were used for cross-sectional analyses. In a subset of individuals  
149 (n=34), additional paired samples collected at 2-4 weeks after a third dose of COVID-19  
150 vaccine and post-breakthrough SARS-CoV-2 infection were used for analysis and only  
151 individuals with all three timepoints were included in the longitudinal analysis. Participant  
152 demographic data for both analyses are summarised in Table 1.

153

#### 154 **Luminex Multiplex assay**

155 A SARS-CoV-2 multi-antigen serology assay was used to detect SARS-CoV-2-specific  
156 IgG antibodies against Spike and nucleoprotein (NP) antigens as described previously<sup>15</sup>.  
157 Briefly, fluorescent and magnetic beads were coated with antigens of interest and  
158 incubated with individual plasma samples to allow binding of antigen-specific antibodies.  
159 Bound antibodies were detected using a secondary anti-human IgG fragment  
160 crystallisable region (Fc) antibody conjugated to phycoerythrin (PE) and analysed using  
161 MAGPIX<sup>®</sup> system. The levels of antigen-specific antibodies were reported as mean  
162 fluorescent intensity (MFI).

163

#### 164 **Affinity proteomics assays**

165 Protein biomarkers were quantified using the Proximity Extension Assay at the WEHI  
166 Genomics facility, on the Olink Target platform using Inflammation and Neurology panels  
167 (Olink Proteomics, Sweden) for a total of 182 protein targets. Briefly, 1µL of each plasma  
168 sample per panel was incubated with a multiplexed set of two oligo-labelled detection  
169 antibodies per protein target, which after proximity extension can form a specific DNA



170 barcode<sup>16</sup>. The barcodes were pre-amplified then detected by qPCR using 96.96 Protein  
171 Expression integrated fluidic circuits (IFCs) on a BioMark HD with HX controller (Fluidigm  
172 / Standard BioTools, USA). Detection cycle threshold or C(t) values were then processed  
173 to NPX values by normalising to the internal Extension Control and the external Inter-  
174 plate Control using Olink<sup>®</sup> Signature software, and batch correction was applied by  
175 intensity normalisation and the OlinkAnalyse R package<sup>17</sup>. The values are expressed in  
176 arbitrary NPX units that are specific to Olink Proteomics platform and are on a log<sub>2</sub>x scale.

177

## 178 **Statistical analyses**

179 Participant were stratified according to SARS-CoV-2 infection and COVID-19 booster  
180 status. Statistical analyses were conducted in R version 4.3.2 (2023-10-31) for macOS  
181 using the lme4, ggplot2, ggeffects, ggthemes, patchwork, OlinkAnalyze, performance,  
182 Boruta, glmnet, glmnetUtils rpart, rattle, e1071, corrplot and corr packages.

183

184 Descriptive statistics were used to compare participant demographic, clinical  
185 characteristics, and exposure factors (Kruskal–Wallis rank-sum test for continuous or  
186 Fisher's exact test for categorical variables). Correlation matrices were plotted by  
187 Spearman's rank correlation test with hierarchical clustering using corrplot package.

188

189 To identify potential protein biomarkers, we used a combination of penalised regression  
190 (lasso) and feature selection algorithm, using glmnet and Boruta packages in R. The  
191 glmnet fitted a generalised linear model via penalised maximum likelihood (lasso, least  
192 absolute shrinkage and selection operator) to enhance the prediction accuracy and

193 interpretability of the resulting statistical model<sup>18,19</sup>. The incorporated model fitted a  
194 traditional logistic regression model for the log-odds with function `glmnet(x, y,`  
195 `standardise=TRUE, alpha = 1, family = "binomial", intercept = T)`; where x variable was  
196 standardised prior to fitting the model sequence and `alpha=1` for the lasso penalty. The  
197 model demonstrated superior performance when employing lasso penalty (`alpha=1`)  
198 compared to a ridge penalty (`alpha=0`) within the elastic-net regularisation path for  
199 regression. Analyte selection also involved the Boruta package in R, which uses wrapper  
200 algorithms coupled with random forest classifiers<sup>20</sup>. The overall accuracy rate is  
201 computed along with a 95 percent confidence interval (95% CI) for this rate (using exact  
202 binomial test; `binom.test` function) and unweighted Kappa statistics are also calculated.  
203 Both accuracy and kappa range from -1 to 1. A value of 1 indicates perfect agreement,  
204 while a value of -1 indicates complete disagreement.

205

206  $F1\ score = (1 + \beta^2) * precision * recall / ((\beta^2 * precision) + recall)$ , where  $precision =$   
207  $A / (A + B)$  and  $recall = A / (A + C)$ .

208  $Kappa = (Observed\ agreement - Chance\ agreement) / (1 - Chance\ agreement)$  or

209  $Kappa = 2 * (TP * TN - FN * FP) / (TP + FP) * (FP + TN) + (TP + FN) * (FN + TN)$

210  $Sensitivity = A / (A + C)$

211  $Specificity = D / (B + D)$

212  $Accuracy = (TP + TN) / (TP + TN + FP + FN)$ .

213

214 Boxplots were plotted displaying the distribution of data; with minimum value, the first  
215 quartile (Q1), the median, the third quartile (Q3), and the maximum value. The

216 olink\_anova\_posthoc performs a post-hoc ANOVA test using the function emmeans from  
217 the R library emmeans with Tukey p-value adjustment per assay (by OlinkID) at  
218 confidence level 0.95, p-value annotations: "\*\*\*\*"=0.001, "\*\*\*"=0.01, "\*\*"=0.05.

219  
220 We employed recursive partitioning and regression trees (rpart) to identify protein  
221 analytes predictive of COVID-19 status (long COVID and COVID-19 recovered, long  
222 COVID and healthy, and COVID-19 recovered and healthy) before vaccination (n = 57).  
223 Models were constructed using rpart and fancyRpartPlot functions in R to understand the  
224 hierarchical relationships and thresholds of protein analytes, extracted by lasso and  
225 Boruta random forest, that differentiated COVID-19 status (long COVID and COVID-19  
226 recovered, long COVID and healthy, and COVID-19 recovered and healthy). Decision  
227 boundaries, generated using support vector machines (SVM) algorithms from the e1071  
228 package in R<sup>21</sup>, were plotted to distinguish between the groups (healthy, recovered, and  
229 long COVID) based on the selected protein concentrations.

230  
231 Longitudinal data (n = 34) was analysed by olink\_lmer function, which fitted a linear  
232 mixed-effects model for each protein analyte or antibodies as outcome measure. It uses  
233 the lmer function from the R library lmerTest and the anova function from the R library  
234 stats. Adjusted p-values are calculated using the p.adjust function from the R library stats  
235 with the Benjamini & Hochberg method. The threshold for significance is  $p < 0.05$ . The  
236 olink\_lmer\_posthoc function is used to extract and plot significant proteins. It performs a  
237 post-hoc analysis based on a linear mixed-effects model using the lmer function. Immune  
238 dynamics were plotted using linear mixed-effects models fitted by the lmer function of the

239 lme4 package. The resulting linear equation of the model was  $y = \alpha + \beta * \text{Group} * \text{Condition}$   
240  $+ (1 | \text{Participant})$ , where group is disease status and condition are exposure factors.  
241 Randomisation was not utilised, as the study aimed to compare individuals with long  
242 COVID individuals with those recovered or uninfected or healthy controls. Data collection  
243 and analysis were not conducted in a blinded manner with respect to the experimental  
244 conditions. Both unsupervised and supervised machine learning algorithms for protein  
245 analyte selection were applied, selecting models that demonstrated relatively good fit.

246

## 247 **Results**

### 248 **Cohort characteristics**

249 A total of 57 participants (aged 20 to 68 years; 38 females, 67%) enrolled in a longitudinal  
250 cohort conducted from October 2020 to April 2023 were included in this study. The  
251 participants were categorised into three groups: healthy SARS-CoV-2 PCR/serology  
252 confirmed uninfected individuals (n = 24; age 20-68 years, median age 37; 14 (58%)  
253 females), COVID-19 recovered (n = 21; age 21-66 years, median age 43; 17 (81%)  
254 females) and long COVID (n = 12; age 30-67 years, median age 56; 7 (58%) females)  
255 with no significant sex difference between groups but median age higher in the long  
256 COVID group (p=0.035) (Fig. 1 and Table 1). Most participants experienced mild to  
257 moderate primary COVID-19 disease with only 9.5% of individuals of the COVID-19  
258 recovered group requiring hospitalisation due to severe disease (Table 1). A range of co-  
259 morbidities (including well-controlled asthma, hypothyroidism, cancer or other chronic  
260 illnesses) was observed among the healthy (13%), COVID-19 recovered (48%) and long  
261 COVID (48%) participants. Half (50%, 6/12) of individuals diagnosed with long COVID

262 reported an alleviation of symptoms during follow-up (4 became asymptomatic before  
263 COVID-19 boosters and 2 before re-infection). Conversely, the remaining cohort (50%)  
264 continued to experience long COVID symptomatology both after receiving a booster  
265 vaccination and breakthrough SARS-CoV-2 infection. The most common symptom  
266 reported in this study cohort was fatigue, brain fog and loss of smell and taste (Fig. 1). Of  
267 the 57 participants, longitudinal analysis was performed on 34 participants with paired  
268 blood samples at three timepoints: pre-vaccination; 2-4 weeks after receiving a booster  
269 COVID-19 vaccine dose; and either after a new SARS-CoV-2 infection (healthy group) or  
270 after re-infection (COVID-19 recovered or long COVID groups).

271

272 **Distinct patterns of inflammatory and neurology-related proteins in plasma from**  
273 **healthy, COVID-19 recovered individuals and long COVID sufferers.**

274 Persistent inflammation has been proposed as a key mechanism underlying long COVID,  
275 particularly because it may explain the varied manifestations associated with this  
276 condition. To determine whether long COVID individuals in our low transmission cohort  
277 align with previous observations of lasting inflammation and whether inflammatory and  
278 neurology-related proteins can be predictive of long COVID, we profiled the levels of 182  
279 plasma proteins using multiplexed affinity proteomics. These plasma samples were  
280 collected at enrolment for healthy (n = 24) and 6-9 months after primary COVID-19  
281 diagnosis for COVID-19 recovered (n = 21) and long COVID individuals (n = 12). All  
282 plasma was collected prior to COVID-19 vaccination for this cross-sectional analysis.  
283 Initial analysis mapped the overall plasma protein profiles of each individual  
284 (supplementary Fig. S1) and correlations between analytes. as Correlation of proteins

285 associated with long COVID disease status were explored using Spearman's rank  
286 correlation analyses (supplementary Fig. S2 and S3). In this first analysis, only TRAIL  
287 was significantly associated with long COVID ( $r = -0.32$ ,  $p = 0.014$ ) (supplementary Fig.  
288 S3). Correlations of analytes between COVID-19 recovered and long COVID groups  
289 (supplementary Fig. S4), healthy and long COVID groups (supplementary Fig. S5) and  
290 healthy and COVID-19 recovered groups (supplementary Fig. S6) were visualised using  
291 network analyses plots of the 182 analytes, where proteins are grouped into clusters  
292 suggesting functional or biological relationships, but not causal interactions. Furthermore,  
293 we used gene set enrichment analysis (GSEA) to associate disease status with specific  
294 groups of proteins (supplementary Fig. S7). While these GSEA results did not reach  
295 statistical significance, the observed pathways highlight the potentially ongoing and  
296 altered processes in long COVID at 6-9 months following primary SARS-CoV-2 infection.  
297 This also extended to some degree to the COVID-19 recovered group where individuals  
298 in the COVID-19 recovered group exhibited upregulated neuroinflammatory pathway  
299 responses compared to the healthy group. However, individuals with long COVID  
300 displayed a more complex neuroinflammatory response profile compared to the COVID-  
301 19 recovered group.

302 To further understand which analytes differed significantly between healthy, COVID-19  
303 recovered and long COVID groups, lasso regression analysis was also performed. First,  
304 we investigated plasma profile differences between long COVID and COVID-19  
305 recovered groups. Lasso regression identified 4 top protein analytes associated with long  
306 COVID (NBL1, IL-20, LXN, MCP-1), with an accuracy of 0.55 (95%CI: 0.24-0.83) (Fig 2B  
307 and C, Table 2). In addition, Boruta random forest and recursive partitioning and

308 regression trees were conducted to identify proteins predictive of COVID-19 status.  
309 Consistent with lasso regression analysis, NBL1 and IL-20 were identified as top features  
310 with both Boruta random forest (Fig. 2A and C) with similar accuracy of 0.55 (0.23 - 0.83;  
311 Table 2) and recursive partitioning and regression trees (Accuracy = 0.88, 95% CI: 0.72-  
312 0.97; and F1 score = 0.91) (Fig 3A and Table 2). IL-20 concentrations were particularly  
313 lower in individuals who recovered compared to long COVID individuals (estimate or  $\beta$  =  
314 -0.29, 95% CI: -0.49 - -0.09, adj p = 0.007) (Fig. 2C). Conversely, long COVID individuals  
315 were more likely to have lower levels of NBL1 ( $< 4.7$ ) than those who recovered (Figs.  
316 2C, 3A and B).

317  
318 Using the same approach, analysis of plasma protein profiles between the long COVID  
319 and healthy groups identified 4 differential proteins (IL-20, CLEC10A, CCL23, TRAIL)  
320 using lasso regression analysis (Fig. 2E) with accuracy of 0.67 (0.35 - 0.91; Table 2), and  
321 collectively 5 top predictive proteins (HAGH, G-CSF, NAAA) with Boruta random forest  
322 (Fig. 2D, F and G) with accuracy of 0.75 (0.43 - 0.95; Table 2) and (HAGH, CLEC10A  
323 and NAAA) using decision tree (Accuracy = 0.89, 95% CI: 0.74-0.97; and F1 score = 0.92;  
324 Fig. 3C). The healthy group had lower levels of HAGH (estimate= -0.88, 95% CI: -1.58 -  
325 -0.18, adj p = 0.02) and CLEC10A concentrations ( $\beta$  = -0.31, 95% CI: -0.62 - -0.005, adj  
326 p = 0.046), but higher TRAIL concentration ( $\beta$ = 0.31, 95% CI = 0.08 - 0.55, adj p = 0.01)  
327 compared to individuals with long COVID (Fig 2F and G). Specifically, the decision tree  
328 analysis revealed that individuals with HAGH NPX levels  $> 5.4$  and/or CLEC10A  $>4.3$  and  
329 NAAA  $< 2.9$  were more likely to be suffering from long COVID compared to the healthy  
330 group (Fig. 3C and D).

331  
332 Finally, we assessed plasma protein profile differences between COVID-19 recovered  
333 and healthy groups. In this comparison, a distinct set of differential proteins was identified  
334 (ARTN, CST5, FGF-19, MCP-1) using lasso regression (Fig. 2I, J and K) with accuracy  
335 of 0.56 (0.31- 0.79) (Table 2). Additionally, predictive proteins consisted of HAGH, DNER  
336 as determined using Boruta random forest (Fig. 2H) with accuracy of 0.72 (0.47 - 0.90)  
337 and HAGH, MCP-1 and ARTN identified using a decision tree (Accuracy = 0.8, 95% CI:  
338 0.65-0.90; and F1 score = 0.82; Fig 3 E and F). The healthy group had higher  
339 concentrations of DNER than COVID-19 recovered ( $\beta$ = 0.28, 95% CI: 0.05 - 0.51, adj p  
340 = 0.018) and individuals with HAGH NPX levels of > 5.3 and/or MCP-1 <12 and ARTN >  
341 -0.15 were more likely to be COVID-19 recovered than healthy (Fig. 3E and F).

342 Collectively these findings demonstrate that distinct plasma protein profiles can be  
343 detected in groups of individuals with different levels of SARS-CoV-2 exposure (healthy  
344 vs. previously SARS-CoV-2-infected) and varying disease outcomes (COVID-19  
345 recovered vs. long COVID), even long after SARS-CoV-2 acute infection and diagnosis.

346  
347 **Lower SARS-CoV-2-specific IgG antibody levels following breakthrough infection**  
348 **in long COVID and COVID-19 recovered individuals compared to healthy**  
349 **individuals.**

350 Humoral responses to COVID-19 vaccines and SARS-CoV-2 infections after vaccination  
351 (breakthrough infections) result in high levels of antigen-specific antibodies<sup>22-24</sup>.  
352 However, this response is poorly documented in individuals with long COVID. To gain  
353 insight into the overall responsiveness to COVID-19 booster vaccination and SARS-CoV-



354 2 breakthrough infection in our cohort, we measured SARS-CoV-2-specific anti-Spike and  
355 anti-NP antibody responses in all individuals (n=57) prior to COVID-19 vaccination, but  
356 6-9 months after infection in COVID-19 recovered and long COVID individuals (Fig. 4; left  
357 panels). Longitudinal analysis of antibody levels was also performed (Fig. 4; right panels)  
358 using paired samples from individuals (n=34) at three timepoints collected at pre-  
359 vaccination (pre-vax), 2-4 weeks after the third COVID-19 vaccine dose (post-booster),  
360 and 2-4 weeks after either new SARS-CoV-2 infection (healthy group) or being re-  
361 infection (COVID-19 recovered or long COVID groups; post(re)infection). As expected  
362 prior to vaccination (pre-vax), individuals previously infected with SARS-CoV-2 had  
363 significantly higher Spike and NP-specific antibodies than healthy individuals (Fig. 4, p  
364 <0.001). However, individuals with long COVID had significantly lower Spike-specific and  
365 NP-specific IgG antibodies compared to the COVID-19 recovered group (Fig. 4 left  
366 panels, p <0.001) before vaccination. Following booster vaccination all three groups  
367 showed high levels of Spike-specific antibodies (Fig. 4; top right panel, p <0.001). At this  
368 time point, as expected, NP-specific antibodies remained higher in the COVID-19  
369 recovered and long COVID groups compared to the healthy group (Fig. 4; bottom right  
370 panel). After breakthrough infection, all groups had increased NP-specific antibody levels  
371 (Fig. 4; bottom right panel). However, vaccinees with long COVID showed substantially  
372 higher NP-specific antibodies than newly infected vaccinees (healthy). In contrast, Spike-  
373 specific antibodies in the latter group were higher compared to antibody levels measured  
374 following re-infection in the COVID-19 recovered and long COVID groups (Fig. 4 top right  
375 panel).

376

377 **Differential plasma profiles after COVID-19 booster vaccination, primary and**  
378 **breakthrough infections in long COVID individuals.**

379 Vaccines are designed to induce short term inflammatory responses in order to achieve  
380 desired immune responses that ultimately provide protection from invading pathogens.  
381 However, the impact of vaccine-induced inflammatory responses in individuals that are  
382 indicated to experience dysregulated inflammatory activity, such as those with long  
383 COVID, is not well-established. Similarly, understanding of inflammatory reactions  
384 following breakthrough SARS-CoV-2 infection in long COVID individuals is lacking. To  
385 investigate these specific aspects, we analysed longitudinal and paired samples from  
386 individuals (n=34) across three timepoints as previously (pre-vaccination, post-booster  
387 and post-infection/re-infection). In this mixed-effects models analyses, we extracted 7  
388 significant proteins (LAT, CASP-8, SIRT2, 4E-BP1, CCL4, STAMBP, and HAGH) from  
389 the 182 measured inflammatory and neurology-related protein levels using the Olink  
390 proteomics assays. These proteins were either different between groups or across time  
391 points within a group (Fig. 5). We found that SIRT2 concentrations were higher in the  
392 healthy group compared to COVID-19 recovered pre-vaccination ( $p=0.03$ ; Fig. 5A), and  
393 these group differences were maintained following the booster COVID-19 dose ( $p = 0.04$ ).  
394 Similar changes were also observed with 4E-BP1 when comparing healthy and COVID-  
395 19 recovered groups ( $p = 0.02$ ) at pre-vaccination and following booster ( $p = 0.21$ ; Fig.  
396 5B). Notably, SIRT2 and 4E-BP1 NPX values were similar between the long COVID and  
397 healthy groups, both at pre-vaccination and post-booster. However, after breakthrough  
398 infection, the levels of these two proteins in both long COVID and healthy groups were  
399 significantly lower than at pre-vaccination and aligned with the COVID-19 recovered

400 group. Similar patterns were observed with LAT and STAMPB (Fig 5B and C) although  
401 substantial differences were only noted between time points within groups. The protein  
402 HAGH, previously identified as a differential and predictive marker at pre-vaccination  
403 using Boruta random forest and lasso regression analysis, was not elevated following  
404 breakthrough infections in this longitudinal analysis (Fig. 5C). In healthy individuals, CCL4  
405 levels decreased after breakthrough infection, but remained similar for the three sample  
406 events in the COVID-19 recovered and long COVID groups (Fig. 5C). Finally, caspase-8  
407 (CASP-8) was significantly higher in the long COVID group at pre-vaccination but  
408 decreased to levels similar to those in the COVID-19 recovered and healthy groups.  
409 CASP-8 was not induced by either COVID-19 vaccination or a breakthrough infection in  
410 any of the three groups (Fig. 5A). Overall, these findings suggest that primary infections  
411 and SARS-CoV-2 breakthrough infections result in dissimilar plasma protein profiles,  
412 particularly in individuals with long COVID. While COVID-19 booster vaccination is  
413 expected to induce a burst of new onset inflammatory responses, this does not appear to  
414 exacerbate or persist divergently in long COVID individuals.

415

## 416 **Discussion**

417 Long COVID is a complex condition that can affect multiple organ systems although its  
418 pathophysiology remains elusive. Emerging concepts suggest that prolonged  
419 inflammation, viral antigen persistence, human herpesvirus reactivation, dysbiosis,  
420 microvascular dysfunction and autoreactive immune responses are probable contributing  
421 factors<sup>25,26</sup>. In this study we focused on establishing the persistent inflammatory and  
422 neurology-related plasma protein profiles after initial disease-related effects subside. We

423 also assessed, primary infections, alongside longitudinal samples to investigate if  
424 dysregulated inflammatory reactions are mirrored or exacerbated post-COVID-19 booster  
425 vaccination and re-infection. Our results suggest that modified levels of neurology-related  
426 and inflammation proteins in plasma can persist up to 6-9 months after primary infection  
427 in long COVID individuals. Notably, these primary infection responses are not repeated  
428 early after breakthrough infection in long COVID individuals.

429

430 We used affinity proteomics to establish inflammatory and neurology-related plasma  
431 protein profiles in our cohort sample set. This highly sensitive multiplexed Proximity-  
432 Extension Assay (PEA, Olink Proteomics) has increasingly been utilised to both  
433 investigate plasma and cerebrospinal fluid (CSF) profiles following COVID-19 in the  
434 search for potential biomarkers for long COVID <sup>12,27-30</sup>. These studies have collectively  
435 identified proteins that can be used to classify long COVID, but also show that different  
436 markers can be related to specific long COVID subtypes based on symptoms. Similarly,  
437 using the same methodology, we identified a panel of plasma proteins from our cross-  
438 sectional analysis (NBL1, IL-20, LXN, MCP-1, CLEC10A, CCL23, TRAIL, HAGH, G-CSF,  
439 and NAAA) that were either biomarkers of long COVID or observed at differential levels  
440 from either healthy or COVID-19 recovered individuals. Of note, decreased levels of  
441 TRAIL, a cytokine with anti-inflammatory properties, in CSF was previously associated  
442 with long COVID and align with our finding in plasma <sup>12</sup>. However, while some of our  
443 proteins have been reported to be differentially expressed across these specific studies,  
444 the remaining proteins in our panel, were not among the proteins previously identified in  
445 plasma as predictive of long COVID. It is likely that the divergent panel of proteins

446 reported between the studies is due to the different COVID-19 sub-groups included for  
447 comparison. These previous studies focused on differences between acutely ill and/or  
448 hospitalised individuals with long COVID sufferers, whereas our study focused on  
449 individuals after recovery from mild to moderate disease and long COVID individuals.  
450 Importantly our samples were collected within a similar timeframe after diagnosis for both  
451 groups. Nevertheless, each study underscores the complexity of long COVID and  
452 highlights the importance of considering various comparisons to comprehensively unravel  
453 serological features of this condition.

454 We found that IL-20 was a prominent feature of long COVID in our cohort. IL-20 is a  
455 pleiotropic cytokine with potent inflammatory properties and has been positively  
456 associated to the severity of SARS-CoV-2 infection <sup>31</sup>. The observation of increased IL-  
457 20 in long COVID individuals is intriguing as IL-20 exerts its effects through the activation  
458 of signal transducer and activator of transcription (STAT) proteins and specifically via the  
459 type I IL-20 receptor complex, which is composed of IL20RA and IL20RB subunits.  
460 Cytokines that use IL-20 receptor complex are believed to be linked to the development  
461 of chronic inflammation and autoimmune diseases <sup>32</sup> with increased IL-20 concentrations  
462 linked to autoantibody production in rheumatoid arthritis patients <sup>33</sup>. This raises the  
463 intriguing possibility that dysregulation of the IL-20 pathway, characterised by enhanced  
464 IL-20 levels, might contribute to the development of autoimmune features known to occur  
465 in a subset of long COVID individuals <sup>34,35</sup>. IL-20 also induces synovial fibroblasts and  
466 kidney mesangial cells to produce pro-inflammatory molecules, including MCP-1 <sup>36,37</sup> a  
467 protein that was also found in our study to be a feature of long COVID.

468

469 Given that neurological symptoms, including fatigue and cognitive dysfunction such as  
470 memory difficulties, attention deficits and sleep disturbances, are common in long COVID  
471 and were frequently reported by our patients, we also quantified protein biomarkers with  
472 known relation to neurological disease. Interestingly HAGH, LXN, Linker For Activation  
473 Of T Cells (LAT) and NAAA have all been related to cognitive performance in older adults  
474 with metabolic syndrome <sup>38</sup>. HAGH is also a potential biomarker of Alzheimer disease <sup>39</sup>.  
475 Increased levels of HAGH have been linked to low cognitive function whereas an inverse  
476 relationship of lower levels of LXN, LAT and NAAA were related to higher cognitive  
477 function <sup>38</sup>. Apart from LAT, these were all elevated in the long COVID group in our cross-  
478 sectional analysis. However, HAGH does not appear to be an indicator of long COVID as  
479 increased HAGH was reported in mild neuro-COVID cases <sup>12</sup>, but was not a predictor of  
480 long COVID in that study. Similarly, we also observed that HAGH was not specifically a  
481 feature of long COVID, but rather a feature of SARS-CoV-2 infection as HAGH was a top  
482 protein for both COVID-19 recovered and long COVID individuals. Nevertheless, taken  
483 together this further verifies a signature of neurological alteration after SARS-CoV-2  
484 infection. Features within this signature may prove useful in monitoring cognitive functions  
485 in affected individuals.

486 Long COVID has also been associated with specific neuro-inflammatory biomarkers  
487 including IL-6, TNF- $\alpha$ , CCL23, G-CSF <sup>40,41</sup>. More recently, upregulated G-CSF and MCP-  
488 1 have been linked to brain fog <sup>42</sup>. While our study corroborates prior research connecting  
489 long COVID to specific neurological and inflammatory biomarkers such as CCL23, G-  
490 CSF, and MCP-1, we found that only MCP-1 was noticeably elevated aligning with  
491 previous report <sup>30</sup>. In contrast reduced levels of CCL23 and G-CSF were detected in long

492 COVID individuals compared to healthy individuals. The role of both CCL23 and G-CSF  
493 in COVID-19 immunity remains perplexing as these proteins have been linked to both  
494 severe disease and/or COVID-19 related mortality in COVID-19 patients <sup>43-48</sup> as well as  
495 being linked to asymptomatic disease and survival <sup>49,50</sup>. Similarly, unchanged or  
496 downregulated MCP-1 has also been associated with long COVID <sup>51,52</sup>. Thus, the  
497 biological relevance of the association with long COVID for these proteins are likely  
498 multifaceted.

499  
500 A noteworthy, and to our knowledge, unique aspect of our study was the access to paired  
501 samples that allowed analysis of inflammatory profiles after COVID-19 booster  
502 vaccination and breakthrough infections in groups of healthy, COVID-19 recovered and  
503 long COVID individuals. Using mixed-effects model, we found that before vaccination,  
504 protein levels, particularly CASP8 and HAGH, were elevated in plasma of long COVID  
505 individuals. Interestingly, the atypical protein levels of CASP8, HAGH and to some extent  
506 LAT normalised to ranges similar to those observed in the healthy and COVID-19  
507 recovered groups after the COVID-19 booster vaccine. Whether this normalisation is a  
508 vaccine-induced effect in long COVID individuals remains to be established and could be  
509 achieved by comparing plasma protein profiles immediately before and after vaccination.  
510 Alternatively, it is possible that the underlying factors driving atypical protein expression  
511 may gradually diminish over time, as suggested by previous research <sup>53</sup>. It is also possible  
512 that the observed changes in certain proteins (such as CASP-8, HAGH and LAT)  
513 correlate with the resolution of cognitive symptoms within our cohort. However, due to the  
514 limited sample size, we were unable to thoroughly investigate this potential association.

515 Importantly, we established that the atypical levels of HAGH and CASP8 were not  
516 exacerbated nor mirrored by re-infection. Furthermore, we showed that protein levels for  
517 SIRT2, 4E-BP1, CCL4 and STAMBP in long COVID individuals and healthy SARS-CoV-  
518 2 naïve controls were similar before vaccination. In contrast, COVID-19 recovered  
519 individuals had lower levels of these specific molecules especially for SIRT2 and 4E-BP1.  
520 The similarity in this profile between long COVID individuals and healthy individuals, and  
521 their difference from COVID-19 recovered individuals, suggests a potential lack of down  
522 regulation of these proteins in response to primary infection in long COVID individuals.  
523 This is particularly interesting to observe with 4E-BP1 and SIRT2 which both have been  
524 linked to viral replication. 4E-BP1 is associated with the PI3K/AKT/mTOR pathway and  
525 blocking this pathway can have antiviral effects. For instance, modulation of this pathway  
526 has previously demonstrated inhibition of Middle East respiratory syndrome coronavirus  
527 (MERS-CoV) replication<sup>54</sup>. Similarly, SIRT2 inhibition can provide broad-spectrum  
528 antiviral effects including inhibition including inhibition of coronavirus replication<sup>55,56</sup>.  
529 Unaltered levels of these proteins could therefore indicate a potential dysregulation of  
530 antiviral processes typically induced to inhibit SARS-CoV-2 replication. Intriguingly the  
531 same pattern is not observed upon re-infection in long COVID individuals. Furthermore,  
532 decreased levels of both 4E-BP1 and SIRT2 in response to infection are also reflected in  
533 previously SARS-CoV-2 naïve healthy individuals. However, whether 4E-BP1 and SIRT2  
534 detected in plasma correlates to intracellular levels and activity remains to be determined.  
535 Finally, we assessed SARS-CoV-2-specific Spike and NP IgG antibody levels in all study  
536 participants. Elevated SARS-CoV-2-specific antibody titres have previously been  
537 reported in long COVID individuals<sup>7,57,58</sup>. Our group had associated these elevated titres



538 with long COVID symptoms such as fatigue <sup>59</sup> in low transmission setting, and some  
539 studies suggest a potential role of viral persistence in driving these responses <sup>60,61</sup>. Other  
540 studies have found no significant difference in antibody titres between individuals with  
541 long COVID and those who have recovered <sup>30,62</sup>. It has been proposed that this may  
542 reflect long COVID individuals that follow two main patterns of antiviral immune  
543 responses. In some individuals, the response is robust, with strong cellular and humoral  
544 responses similar to those seen in people who have fully recovered and in others, there  
545 are lower antiviral responses, but still with detectable antigen-specific CD4+ T cells and/or  
546 antibodies <sup>63</sup>. We observed that both Spike and NP-specific IgG antibodies were lower in  
547 the long COVID group than in the recovered group 6-9 months after primary infection.  
548 Although this observation is likely the result of multiple factors, future studies could  
549 specifically investigate antibody responses in parallel to 4E-BP1 and SIRT2 plasma  
550 concentrations in a larger cohort to further decipher the potential divergent antiviral  
551 activities in long COVID.

552

553 There are some differences and limitations in our study which may be reflected in the  
554 protein biomarkers discovered. Samples were selected based on the availability of  
555 specimens that met our long COVID criteria and had been collected at a specific timepoint  
556 after diagnosis. Additionally, for the longitudinal analysis, we were restricted by samples  
557 available for individuals that had also received a COVID-19 booster vaccination and had  
558 had a breakthrough infection while enrolled in the study. For these reasons, our sample  
559 set was also heterogeneous in terms of long COVID symptoms. Consequently, this limited  
560 the statistical power of our analyses, particularly for subgroup analyses and examining

561 differing long COVID trajectories. This limitation means that non-significant findings may  
562 mask true associations between variables, necessitating cautious interpretation of  
563 regression estimates following booster and (re-)infection. Larger cohort sizes are needed  
564 in future studies to validate these findings. Furthermore, we lack information on the  
565 specific variant responsible for breakthrough infections. Although the timing of these  
566 breakthrough SARS-CoV-2 infections in our cohort aligns with epidemiological data  
567 indicating that most community infections at the time were due to the Omicron variant  
568 <sup>64,65</sup>, definitive conclusion on breakthrough infective strains cannot be drawn. Finally, our  
569 analyses does not reveal how or whether our putative biomarker proteins are  
570 mechanistically linked to long COVID and further studies need to be conducted to explore  
571 their functional role in this context.

572  
573 In conclusion, we identified several biomarkers that were substantially associated with  
574 long COVID which can be further explored to discern long COVID disease subsets. Our  
575 longitudinal analysis demonstrated that COVID-19 booster vaccination efficiently induced  
576 high levels of antigen-specific antibodies without resulting in exacerbation of atypical  
577 inflammatory and neurology-related plasma protein levels. Notably, we established that  
578 plasma profiles following SARS-CoV-2 breakthrough infection in long COVID individuals  
579 diverged from the primary infection that lacked features of previously noted dysregulation.  
580 These findings provide intriguing and valuable insight into immune response outcomes,  
581 especially to SARS-CoV-2 re-infections, in individuals with long COVID which may  
582 facilitate long COVID management strategies for this poorly understood condition.

583 **Figure legends**

584 **Figure 1: Study overview.**

585 Overview of the study including: (Top panel) Cohort participant description, sample  
586 collection time points and associated long COVID symptoms. (Middle panel) visual  
587 representation of methodology and (Bottom panel) summary of predictive and  
588 differentially expressed proteins in long COVID after primary SARS-CoV-2 infection and  
589 antibody levels pre-and post-COVID-19 booster vaccination and (re)infection. Created  
590 with BioRender.com (2024)

591

592 **Figure 2: Atypical levels of neurology-related and inflammatory biomarkers in**  
593 **patients with long COVID detected 6-9 months after primary SARS-CoV-2 infection.**

594 Data representing plasma levels of 182 proteins from 57 individuals was analysed using  
595 Boruta feature selection<sup>20</sup> and lasso regression models (glmnet function<sup>18,19</sup>) to identify  
596 group differences. Boruta feature selection subplots representing differences between (a)  
597 recovered vs. long COVID, (d) healthy vs. long COVID and (h) healthy vs. recovered.  
598 Blue box-plots correspond to the shadow attributes (with minimum, mean and maximum  
599 attribute values), green box-plots represent important variables, yellow box-plots are  
600 tentative, and red box-plots are not significant. Subplots represent the coefficient paths  
601 of lasso regression models to identify group differences between (b) COVID-19 recovered  
602 vs. long COVID, (e) healthy vs. long COVID and (i) healthy vs. COVID-19 recovered. The  
603 x-axis shows the fraction of deviance explained against a coefficient profile plot. Subplots  
604 representing boxplots for identified differential proteins between (c) COVID-19 recovered  
605 vs. long COVID, (f and g) healthy vs. long COVID and (j and k) healthy vs. COVID-19

606 recovered individuals. Each circle represents an individual. The lower and upper hinges  
607 correspond to the first and third quartiles (25th and 75th percentiles), with the median at  
608 the midpoint. Boxplots were created using `olink_anova_posthoc` and `olink_boxplot`  
609 function <sup>17</sup> with Tukey p-value adjustment for multiple testing within an assay at  
610 confidence level 0.95; two-tailed p <0.05 #; 0.01-0.001 ##; <0.001 ### were considered  
611 significant for group differences.

612

613 **Figure 3: Decision tree and hyperplane boundaries displaying hierarchical**  
614 **relationships and thresholds of protein features detected at 6-9 months after**  
615 **primary SARS-CoV-2 infection to predict long COVID or COVID-19 recovery.**

616 Models were constructed using `rpart` and `fancyRpartPlot` functions in R to understand the  
617 hierarchical relationships and thresholds among protein analytes, extracted by lasso  
618 regression models and Boruta random forest models that differentiated between (a) long  
619 COVID and COVID-19 recovered, (b) long COVID and healthy, and (c) COVID-19  
620 recovered and healthy <sup>66,67</sup>. Two-dimensional scatter plots of NPX values for the 2 top  
621 protein analytes separating three groups (b) NBL1 and IL-20 for COVID-19 recovered vs.  
622 long COVID with 57% accuracy (d) CLEC10A and HAGH for healthy vs. long COVID with  
623 65% accuracy; and (f) HAGH and MCP-1 for healthy vs. COVID-19 recovered with 56%  
624 accuracy). A decision boundary, created using support vector machines (SVM) algorithms  
625 from the `e1071` package in R <sup>21</sup>, separates the groups based on the protein  
626 concentrations.

627

628 **Figure 4. High levels of SARS-CoV-2-specific IgG antibodies post-COVID-19**  
629 **booster vaccination and post (re)infection.** Left panels: Levels of Spike and anti-  
630 nucleoprotein (NP) IgG antibodies in healthy (n=24; black), COVID-19 recovered (n=21;  
631 blue) and long COVID individuals (n=12; red) 6-9 months after SARS-CoV-2 infection.  
632 Each circle represents an individual. The lower and upper hinges correspond to the first  
633 and third quartiles (25th and 75th percentiles), with the median at the midpoint. Right  
634 panels: Levels of Spike and anti-nucleoprotein (NP) IgG antibodies in healthy (n=13;  
635 black), COVID-19 recovered (n=13; blue) and long COVID individuals (n=8; red) 6-9  
636 months after SARS-CoV-2 infection (pre-vax), 2-4 weeks after COVID-19 booster  
637 vaccination (post-booster) and 2-4 weeks after SARS-CoV-2 (re)infection (post-  
638 (re)infection) The y-axes show antibody levels in median fluorescence intensities (MFI).  
639 (Left panels) Wilcoxon Rank Sum and Signed Rank Tests were performed with Tukey p-  
640 value adjustment for multiple testing within an assay at confidence level 0.95; two-tailed  
641  $p < 0.05$  #; 0.01-0.001 ##;  $< 0.001$  ### were considered significant for group differences.  
642 (Right panels) Mixed-effects models with the subject as a random effect was performed  
643 to analyse longitudinal data from 34 individuals categorised as HC, COVID-19 recovered  
644 and long COVID groups with lmer function and Benjamini-Hochberg procedure in R.  
645 Estimated marginal means with 95% confidence intervals are depicted as vertical lines  
646 with error bars. Individual data points are represented as circles. Two-tailed  $p < 0.05$  #;  
647 0.01-0.001 ##;  $< 0.001$  ### were considered significant for group differences (recovered  
648 vs. long COVID, HC vs. long COVID and HC vs. recovered) and  $p < 0.05$  \*; 0.01-0.001  
649 \*\*,  $< 0.001$  \*\*\* for longitudinal changes.  
650

651 **Figure 5. Longitudinal analysis of neuro-inflammatory profiles using mixed-effects**  
652 **models at pre-vaccination, post-COVID-19 booster vaccination and post**  
653 **(re)infections.**

654 Mixed-effects models with the subject as a random effect were performed to analyse  
655 longitudinal data from 34 individuals categorised as healthy, COVID-19 recovered and  
656 long COVID. Paired samples collected at pre-vaccination, 2-4 weeks post COVID-19  
657 booster vaccination and 2-4 weeks post-(re)infection was included for each individual.  
658 Linear modelling was performed to identify important proteins and the Benjamini-  
659 Hochberg procedure used to control for false discoveries among the 182 assays used<sup>17</sup>.  
660 Within-assay multiple testing correction was applied using the Benjamini-Hochberg  
661 procedure with Kenward-Roger degrees-of-freedom method for the 15 selected  
662 contrasts. Estimated marginal means with 95% confidence intervals are depicted as  
663 vertical lines with error bars. Individual data points are represented as circles. Two-tailed  
664 test,  $p < 0.05$  #; 0.01-0.001 ##;  $< 0.001$  ### were considered significant for group  
665 differences (COVID-19 recovered vs. long COVID, healthy vs. long COVID and healthy  
666 vs. COVID-19 recovered) and  $p < 0.05$  \*; 0.01-0.001 \*\*;  $< 0.001$  \*\*\* for longitudinal  
667 changes<sup>68</sup>

668

669 Table 1: Baseline demographic and clinical characteristics of the study cohort

| Variable                                  | Baseline (N = 57)               |                                  |                                      |                          | Longitudinal (n = 34)          |                                  |                                     |                          |
|-------------------------------------------|---------------------------------|----------------------------------|--------------------------------------|--------------------------|--------------------------------|----------------------------------|-------------------------------------|--------------------------|
|                                           | Healthy*<br>N = 24 <sup>1</sup> | Recovered<br>N = 21 <sup>1</sup> | Long<br>COVID<br>N = 12 <sup>1</sup> | p-<br>value <sup>2</sup> | Healthy<br>N = 13 <sup>1</sup> | Recovered<br>N = 13 <sup>1</sup> | Long<br>COVID<br>N = 8 <sup>1</sup> | p-<br>value <sup>2</sup> |
| <b>Sex: Female</b>                        | 14 / 24<br>(58%)                | 17 / 21<br>(81%)                 | 7 / 12<br>(58%)                      | 0.2                      | 9 / 13<br>(69%)                | 12 / 13<br>(92%)                 | 4 / 8<br>(50%)                      | 0.11                     |
| <b>Age: Median<br/>(IQR)</b>              | 37 (30,<br>46)                  | 43 (36, 57)                      | 56 (43,<br>60)                       | 0.035                    | 44 (37,<br>47)                 | 49 (41, 57)                      | 57 (53,<br>60)                      | 0.068                    |
| Age range<br>(min-max)                    | 20, 68                          | 21, 66                           | 30, 67                               |                          | 20, 63                         | 21, 66                           | 30, 66                              |                          |
| <b>Comorbidity<sup>#</sup></b>            | 3 / 24<br>(13%)                 | 10 / 21<br>(48%)                 | 7 / 12<br>(58%)                      | 0.008                    | 3 / 13<br>(23%)                | 6 / 13<br>(46%)                  | 7 / 8<br>(88%)                      | 0.019                    |
| <b>COVID-19<br/>disease status</b>        |                                 |                                  |                                      | <0.001                   |                                |                                  |                                     | <0.001                   |
| Healthy or<br>uninfected*                 | 24 / 24<br>(100%)               | 0 / 21 (0%)                      | 0 / 12<br>(0%)                       |                          | 13 / 13<br>(100%)              | 0 / 13 (0%)                      | 0 / 8<br>(0%)                       |                          |
| Asymptomatic                              | -                               | 1 / 21<br>(4.8%)                 | 0 / 12<br>(0%)                       |                          | -                              | 1 / 13<br>(7.7%)                 | 0 / 8<br>(0%)                       |                          |
| Mild-<br>Moderate                         | -                               | 18 / 21<br>(86%)                 | 12 / 12<br>(100%)                    |                          | -                              | 11 / 13<br>(85%)                 | 8 / 8<br>(100%)                     |                          |
| Severe                                    | -                               | 2 / 21<br>(9.5%)                 | 0 / 12<br>(0%)                       |                          | -                              | 1 / 13<br>(7.7%)                 | 0 / 8<br>(0%)                       |                          |
| <b>Vaccine:<br/>Two-dose<br/>schedule</b> |                                 |                                  |                                      | 0.2                      |                                |                                  |                                     | 0.3                      |
| AstraZeneca                               | 5 / 24<br>(21%)                 | 3 / 21<br>(14%)                  | 5 / 12<br>(42%)                      |                          | 4 / 13<br>(31%)                | 2 / 13<br>(15%)                  | 4 / 8<br>(50%)                      |                          |
| Pfizer                                    | 19 / 24<br>(79%)                | 18 / 21<br>(86%)                 | 7 / 12<br>(58%)                      |                          | 9 / 13<br>(69%)                | 11 / 13<br>(85%)                 | 4 / 8<br>(50%)                      |                          |
| <b>Vaccine:<br/>Third dose</b>            |                                 |                                  |                                      |                          |                                |                                  |                                     | >0.9                     |
| Moderna                                   | -                               | -                                | -                                    | -                        | 3 / 13<br>(23%)                | 4 / 13<br>(31%)                  | 2 / 8<br>(25%)                      |                          |

|        |   |   |   |   |                  |                 |                |  |
|--------|---|---|---|---|------------------|-----------------|----------------|--|
| Pfizer | - | - | - | - | 10 / 13<br>(77%) | 9 / 13<br>(69%) | 6 / 8<br>(75%) |  |
|--------|---|---|---|---|------------------|-----------------|----------------|--|

670 <sup>1</sup>n / N (%)

671 <sup>2</sup>Fisher's exact test; Kruskal-Wallis rank sum test

672 - Not relevant

673 # Comorbidities include well-controlled asthma, hypothyroidism, cancer or other chronic illnesses

674 \* During follow-up after booster COVID-19 doses, individuals in healthy group were infected, whereas individuals  
675 who were enrolled as COVID-19 recovered or long COVID were re-infected



676 Table 2: Best features identified by selected models at pre-vaccination time point, and models accuracy.

| Condition               | No. of features | Best features                | Model                                                   | F1 score | Kappa | Sensitivity | Specificity | Accuracy(95%CI)    |
|-------------------------|-----------------|------------------------------|---------------------------------------------------------|----------|-------|-------------|-------------|--------------------|
| Recovered vs Long COVID | 4               | NBL1, IL-20, LXN, MCP-1      | LASSO (Least Absolute Shrinkage and Selection Operator) | 0.62     | 0.07  | 0.67        | 0.40        | 0.55 (0.24- 0.83)  |
|                         | 2               | NBL1, IL-20                  | Boruta Random Forest                                    | 0.62     | 0.07  | 0.67        | 0.40        | 0.55 (0.23 - 0.83) |
| Healthy vs Long COVID   | 4               | IL-20, CLEC10A, CCL23, TRAIL | LASSO                                                   | 0.71     | 0.31  | 0.71        | 0.60        | 0.67 (0.35 - 0.91) |
|                         | 3               | HAGH, G-CSF, NAAA            | Boruta Random Forest                                    | 0.82     | 0.44  | 0.99        | 0.40        | 0.75 (0.43 - 0.95) |
| Healthy vs Recovered    | 4               | ARTN, CST5, FGF-19, MCP-1    | LASSO                                                   | 0.67     | 0.18  | 0.99        | 0.20        | 0.56 (0.31- 0.79)  |
|                         | 2               | HAGH, DNER                   | Boruta Random Forest                                    | 0.74     | 0.46  | 0.88        | 0.60        | 0.72 (0.47 - 0.90) |

677

## 678 References

- 679 1 WHO Long COVID Definition, <[https://www.who.int/europe/news-room/fact-sheets/item/post-](https://www.who.int/europe/news-room/fact-sheets/item/post-covid-19-condition)  
680 [covid-19-condition](https://www.who.int/europe/news-room/fact-sheets/item/post-covid-19-condition)> (
- 681 2 Davis, H. E., McCorkell, L., Vogel, J. M. & Topol, E. J. Long COVID: major findings, mechanisms and  
682 recommendations. *Nat Rev Microbiol* **21**, 133-146 (2023). [https://doi.org/10.1038/s41579-022-](https://doi.org/10.1038/s41579-022-00846-2)  
683 [00846-2](https://doi.org/10.1038/s41579-022-00846-2)
- 684 3 Ceban, F. *et al.* Fatigue and cognitive impairment in Post-COVID-19 Syndrome: A systematic  
685 review and meta-analysis. *Brain Behav Immun* **101**, 93-135 (2022).  
686 <https://doi.org/10.1016/j.bbi.2021.12.020>
- 687 4 Al-Aly, Z., Bowe, B. & Xie, Y. Long COVID after breakthrough SARS-CoV-2 infection. *Nat Med* **28**,  
688 1461-1467 (2022). <https://doi.org/10.1038/s41591-022-01840-0>
- 689 5 Ayoubkhani, D. *et al.* Risk of Long COVID in People Infected With Severe Acute Respiratory  
690 Syndrome Coronavirus 2 After 2 Doses of a Coronavirus Disease 2019 Vaccine: Community-Based,  
691 Matched Cohort Study. *Open Forum Infect Dis* **9**, ofac464 (2022).  
692 <https://doi.org/10.1093/ofid/ofac464>
- 693 6 Group, P.-C. C. Clinical characteristics with inflammation profiling of long COVID and association  
694 with 1-year recovery following hospitalisation in the UK: a prospective observational study. *Lancet*  
695 *Respir Med* **10**, 761-775 (2022). [https://doi.org/10.1016/S2213-2600\(22\)00127-8](https://doi.org/10.1016/S2213-2600(22)00127-8)
- 696 7 Klein, J. *et al.* Distinguishing features of long COVID identified through immune profiling. *Nature*  
697 **623**, 139-148 (2023). <https://doi.org/10.1038/s41586-023-06651-y>
- 698 8 Peluso, M. J. *et al.* Plasma Markers of Neurologic Injury and Inflammation in People With Self-  
699 Reported Neurologic Postacute Sequelae of SARS-CoV-2 Infection. *Neurol Neuroimmunol*  
700 *Neuroinflamm* **9** (2022). <https://doi.org/10.1212/NXI.000000000200003>
- 701 9 Phetsouphanh, C. *et al.* Immunological dysfunction persists for 8 months following initial mild-to-  
702 moderate SARS-CoV-2 infection. *Nat Immunol* **23**, 210-216 (2022).  
703 <https://doi.org/10.1038/s41590-021-01113-x>
- 704 10 Cervia-Hasler, C. *et al.* Persistent complement dysregulation with signs of thromboinflammation  
705 in active Long Covid. *Science* **383**, eadg7942 (2024). <https://doi.org/10.1126/science.adg7942>
- 706 11 Gu, X. *et al.* Probing long COVID through a proteomic lens: a comprehensive two-year longitudinal  
707 cohort study of hospitalised survivors. *EBioMedicine* **98**, 104851 (2023).  
708 <https://doi.org/10.1016/j.ebiom.2023.104851>
- 709 12 Etter, M. M. *et al.* Severe Neuro-COVID is associated with peripheral immune signatures,  
710 autoimmunity and neurodegeneration: a prospective cross-sectional study. *Nat Commun* **13**,  
711 6777 (2022). <https://doi.org/10.1038/s41467-022-34068-0>
- 712 13 Tandon, P. *et al.* Unraveling Links between Chronic Inflammation and Long COVID: Workshop  
713 Report. *J Immunol* **212**, 505-512 (2024). <https://doi.org/10.4049/jimmunol.2300804>
- 714 14 Eriksson, E. M. *et al.* Cohort Profile: A longitudinal Victorian COVID-19 cohort (COVID PROFILE).  
715 *medRxiv*, 2023.2004.2027.23289157 (2023). <https://doi.org/10.1101/2023.04.27.23289157>
- 716 15 Mazhari, R. *et al.* SARS-CoV-2 Multi-Antigen Serology Assay. *Methods Protoc* **4** (2021).  
717 <https://doi.org/10.3390/mps4040072>
- 718 16 Assarsson, E. *et al.* Homogenous 96-plex PEA immunoassay exhibiting high sensitivity, specificity,  
719 and excellent scalability. *PLoS One* **9**, e95192 (2014).  
720 <https://doi.org/10.1371/journal.pone.0095192>
- 721 17 Nevola K *et al.* `_OlinkAnalyze`: Facilitate Analysis of Proteomic Data from Olink\_. R package version  
722 3.6.2,. (2024).
- 723 18 Friedman, J., Hastie, T. & Tibshirani, R. Regularization Paths for Generalized Linear Models via  
724 Coordinate Descent. *J Stat Softw* **33**, 1-22 (2010).

- 725 19 Tay, J. K., Narasimhan, B. & Hastie, T. Elastic Net Regularization Paths for All Generalized Linear  
726 Models. *J Stat Softw* **106** (2023). <https://doi.org/10.18637/jss.v106.i01>
- 727 20 Kursu, M. B., & Rudnicki, W. R. Feature Selection with the Boruta Package. *Journal of Statistical*  
728 *Software* **36**, 1-13 (2010).
- 729 21 Meyer D, Dimitriadou E, Hornik K, Weingessel A & F, L. \_e1071: Misc Functions of the Department  
730 of Statistics, Probability Theory Group (Formerly: E1071), TU Wien\_. R package version 1.7-14.  
731 (2023).
- 732 22 Gianfagna, F. *et al.* Anti-SARS-CoV-2 antibody levels and kinetics of vaccine response: potential  
733 role for unresolved inflammation following recovery from SARS-CoV-2 infection. *Sci Rep* **12**, 385  
734 (2022). <https://doi.org/10.1038/s41598-021-04344-y>
- 735 23 Koutsakos, M. *et al.* The magnitude and timing of recalled immunity after breakthrough infection  
736 is shaped by SARS-CoV-2 variants. *Immunity* **55**, 1316-1326 e1314 (2022).  
737 <https://doi.org/10.1016/j.immuni.2022.05.018>
- 738 24 Zhang, Z. *et al.* Humoral and cellular immune memory to four COVID-19 vaccines. *Cell* **185**, 2434-  
739 2451 e2417 (2022). <https://doi.org/10.1016/j.cell.2022.05.022>
- 740 25 Mehandru, S. & Merad, M. Pathological sequelae of long-haul COVID. *Nat Immunol* **23**, 194-202  
741 (2022). <https://doi.org/10.1038/s41590-021-01104-y>
- 742 26 Peluso, M. J. & Deeks, S. G. Early clues regarding the pathogenesis of long-COVID. *Trends Immunol*  
743 **43**, 268-270 (2022). <https://doi.org/10.1016/j.it.2022.02.008>
- 744 27 Iosef, C. *et al.* Plasma proteome of Long-COVID patients indicates HIF-mediated vasculo-  
745 proliferative disease with impact on brain and heart function. *J Transl Med* **21**, 377 (2023).  
746 <https://doi.org/10.1186/s12967-023-04149-9>
- 747 28 Liew, F. *et al.* Large-scale phenotyping of patients with long COVID post-hospitalization reveals  
748 mechanistic subtypes of disease. *Nat Immunol* **25**, 607-621 (2024).  
749 <https://doi.org/10.1038/s41590-024-01778-0>
- 750 29 Patel, M. A. *et al.* Organ and cell-specific biomarkers of Long-COVID identified with targeted  
751 proteomics and machine learning. *Mol Med* **29**, 26 (2023). <https://doi.org/10.1186/s10020-023-00610-z>
- 752
- 753 30 Zhao, J. *et al.* Plasma biomarkers for systemic inflammation in COVID-19 survivors. *Proteomics Clin*  
754 *Appl* **16**, e2200031 (2022). <https://doi.org/10.1002/prca.202200031>
- 755 31 Rajamanickam, A. *et al.* Characterization of IL-10 Family of Cytokines in Acute and Convalescent  
756 COVID-19 Individuals. *J Interferon Cytokine Res* **43**, 469-477 (2023).  
757 <https://doi.org/10.1089/jir.2023.0075>
- 758 32 Chen, J., Caspi, R. R. & Chong, W. P. IL-20 receptor cytokines in autoimmune diseases. *J Leukoc*  
759 *Biol* **104**, 953-959 (2018). <https://doi.org/10.1002/JLB.MR1117-471R>
- 760 33 Kragstrup, T. W. *et al.* The interleukin-20 receptor axis in early rheumatoid arthritis: novel links  
761 between disease-associated autoantibodies and radiographic progression. *Arthritis Res Ther* **18**,  
762 61 (2016). <https://doi.org/10.1186/s13075-016-0964-7>
- 763 34 Chen, Y. *et al.* New-onset autoimmune phenomena post-COVID-19 vaccination. *Immunology* **165**,  
764 386-401 (2022). <https://doi.org/10.1111/imm.13443>
- 765 35 Wang, E. Y. *et al.* Diverse functional autoantibodies in patients with COVID-19. *Nature* **595**, 283-  
766 288 (2021). <https://doi.org/10.1038/s41586-021-03631-y>
- 767 36 Hsu, Y. H. *et al.* Anti-IL-20 monoclonal antibody inhibited inflammation and protected against  
768 cartilage destruction in murine models of osteoarthritis. *PLoS One* **12**, e0175802 (2017).  
769 <https://doi.org/10.1371/journal.pone.0175802>
- 770 37 Kragstrup, T. W. *et al.* Increased interleukin (IL)-20 and IL-24 target osteoblasts and synovial  
771 monocytes in spondyloarthritis. *Clin Exp Immunol* **189**, 342-351 (2017).  
772 <https://doi.org/10.1111/cei.12973>

- 773 38 Llaurador-Coll, M. *et al.* Plasma levels of neurology-related proteins are associated with cognitive  
774 performance in an older population with overweight/obesity and metabolic syndrome.  
775 *Geroscience* **45**, 2457-2470 (2023). <https://doi.org/10.1007/s11357-023-00764-y>
- 776 39 Ahmad, S. *et al.* CDH6 and HAGH protein levels in plasma associate with Alzheimer's disease in  
777 APOE epsilon4 carriers. *Sci Rep* **10**, 8233 (2020). <https://doi.org/10.1038/s41598-020-65038-5>
- 778 40 Lai, Y. J. *et al.* Biomarkers in long COVID-19: A systematic review. *Front Med (Lausanne)* **10**,  
779 1085988 (2023). <https://doi.org/10.3389/fmed.2023.1085988>
- 780 41 Thomas, C. *et al.* Blood Biomarkers of Long COVID: A Systematic Review. *Mol Diagn Ther* (2024).  
781 <https://doi.org/10.1007/s40291-024-00731-z>
- 782 42 Greene, C. *et al.* Blood-brain barrier disruption and sustained systemic inflammation in individuals  
783 with long COVID-associated cognitive impairment. *Nat Neurosci* **27**, 421-432 (2024).  
784 <https://doi.org/10.1038/s41593-024-01576-9>
- 785 43 Bello, S. *et al.* IL-6 and cfDNA monitoring throughout COVID-19 hospitalization are accurate  
786 markers of its outcomes. *Respir Res* **24**, 125 (2023). [https://doi.org/10.1186/s12931-023-02426-](https://doi.org/10.1186/s12931-023-02426-1)  
787 [1](https://doi.org/10.1186/s12931-023-02426-1)
- 788 44 deKay, J. T. *et al.* DEspR(high) neutrophils are associated with critical illness in COVID-19. *Sci Rep*  
789 **11**, 22463 (2021). <https://doi.org/10.1038/s41598-021-01943-7>
- 790 45 Hawerkamp, H. C. *et al.* Characterisation of the pro-inflammatory cytokine signature in severe  
791 COVID-19. *Front Immunol* **14**, 1170012 (2023). <https://doi.org/10.3389/fimmu.2023.1170012>
- 792 46 Kalinina, O. *et al.* Cytokine Storm Signature in Patients with Moderate and Severe COVID-19. *Int J*  
793 *Mol Sci* **23** (2022). <https://doi.org/10.3390/ijms23168879>
- 794 47 Metzemaekers, M. *et al.* Kinetics of peripheral blood neutrophils in severe coronavirus disease  
795 2019. *Clin Transl Immunology* **10**, e1271 (2021). <https://doi.org/10.1002/cti2.1271>
- 796 48 Noren Hooten, N. *et al.* Association of extracellular vesicle inflammatory proteins and mortality.  
797 *Sci Rep* **12**, 14049 (2022). <https://doi.org/10.1038/s41598-022-17944-z>
- 798 49 Monserrat, J. *et al.* Role of Innate and Adaptive Cytokines in the Survival of COVID-19 Patients. *Int*  
799 *J Mol Sci* **23** (2022). <https://doi.org/10.3390/ijms231810344>
- 800 50 Soares-Schanoski, A. *et al.* Asymptomatic SARS-CoV-2 Infection Is Associated With Higher Levels  
801 of Serum IL-17C, Matrix Metalloproteinase 10 and Fibroblast Growth Factors Than Mild  
802 Symptomatic COVID-19. *Front Immunol* **13**, 821730 (2022).  
803 <https://doi.org/10.3389/fimmu.2022.821730>
- 804 51 Besteher, B. *et al.* Cortical thickness alterations and systemic inflammation define long-COVID  
805 patients with cognitive impairment. *Brain Behav Immun* **116**, 175-184 (2024).  
806 <https://doi.org/10.1016/j.bbi.2023.11.028>
- 807 52 Kovarik, J. J. *et al.* A multi-omics based anti-inflammatory immune signature characterizes long  
808 COVID-19 syndrome. *iScience* **26**, 105717 (2023). <https://doi.org/10.1016/j.isci.2022.105717>
- 809 53 Phetsouphanh, C. *et al.* Improvement of immune dysregulation in individuals with long COVID at  
810 24-months following SARS-CoV-2 infection. *Nat Commun* **15**, 3315 (2024).  
811 <https://doi.org/10.1038/s41467-024-47720-8>
- 812 54 Kindrachuk, J. *et al.* Antiviral potential of ERK/MAPK and PI3K/AKT/mTOR signaling modulation  
813 for Middle East respiratory syndrome coronavirus infection as identified by temporal kinome  
814 analysis. *Antimicrob Agents Chemother* **59**, 1088-1099 (2015).  
815 <https://doi.org/10.1128/AAC.03659-14>
- 816 55 Kong, F. *et al.* Sirtuins as Potential Therapeutic Targets for Hepatitis B Virus Infection. *Front Med*  
817 *(Lausanne)* **8**, 751516 (2021). <https://doi.org/10.3389/fmed.2021.751516>
- 818 56 Roche, K. L. *et al.* An allosteric inhibitor of sirtuin 2 deacetylase activity exhibits broad-spectrum  
819 antiviral activity. *J Clin Invest* **133** (2023). <https://doi.org/10.1172/JCI158978>

- 820 57 Acosta-Ampudia, Y. *et al.* Persistent Autoimmune Activation and Proinflammatory State in Post-  
821 Coronavirus Disease 2019 Syndrome. *J Infect Dis* **225**, 2155-2162 (2022).  
822 <https://doi.org/10.1093/infdis/jiac017>
- 823 58 Yin, K. *et al.* Long COVID manifests with T cell dysregulation, inflammation and an uncoordinated  
824 adaptive immune response to SARS-CoV-2. *Nat Immunol* **25**, 218-225 (2024).  
825 <https://doi.org/10.1038/s41590-023-01724-6>
- 826 59 Blomberg, B. *et al.* Long COVID in a prospective cohort of home-isolated patients. *Nat Med* **27**,  
827 1607-1613 (2021). <https://doi.org/10.1038/s41591-021-01433-3>
- 828 60 Ghafari, M. *et al.* Prevalence of persistent SARS-CoV-2 in a large community surveillance study.  
829 *Nature* **626**, 1094-1101 (2024). <https://doi.org/10.1038/s41586-024-07029-4>
- 830 61 Zollner, A. *et al.* Postacute COVID-19 is Characterized by Gut Viral Antigen Persistence in  
831 Inflammatory Bowel Diseases. *Gastroenterology* **163**, 495-506 e498 (2022).  
832 <https://doi.org/10.1053/j.gastro.2022.04.037>
- 833 62 Augustin, M. *et al.* Immunological fingerprint in coronavirus disease-19 convalescents with and  
834 without post-COVID syndrome. *Front Med (Lausanne)* **10**, 1129288 (2023).  
835 <https://doi.org/10.3389/fmed.2023.1129288>
- 836 63 Kervecan, J. *et al.* Divergent adaptive immune responses define two types of long COVID. *Front*  
837 *Immunol* **14**, 1221961 (2023). <https://doi.org/10.3389/fimmu.2023.1221961>
- 838 64 COVID-19 Australia: Epidemiology Report 57  
839 <[https://www1.health.gov.au/internet/main/publishing.nsf/Content/C50CAE02452A48A7CA25](https://www1.health.gov.au/internet/main/publishing.nsf/Content/C50CAE02452A48A7CA2587320081F7BF/$File/covid_19_australia_epidemiology_report_57_reporting_period_ending_16_january_2022.pdf)  
840 [87320081F7BF/\\$File/covid\\_19\\_australia\\_epidemiology\\_report\\_57\\_reporting\\_period\\_ending\\_16](https://www1.health.gov.au/internet/main/publishing.nsf/Content/C50CAE02452A48A7CA2587320081F7BF/$File/covid_19_australia_epidemiology_report_57_reporting_period_ending_16_january_2022.pdf)  
841 [\\_january\\_2022.pdf](https://www1.health.gov.au/internet/main/publishing.nsf/Content/C50CAE02452A48A7CA2587320081F7BF/$File/covid_19_australia_epidemiology_report_57_reporting_period_ending_16_january_2022.pdf)> (
- 842 65 COVID-19 Australia: Epidemiology Report60,  
843 <[https://www1.health.gov.au/internet/main/publishing.nsf/Content/C50CAE02452A48A7CA25](https://www1.health.gov.au/internet/main/publishing.nsf/Content/C50CAE02452A48A7CA2587320081F7BF/$File/covid_19_australia_epidemiology_report_60_reporting_period_ending_10_april_2022.pdf)  
844 [87320081F7BF/\\$File/covid\\_19\\_australia\\_epidemiology\\_report\\_60\\_reporting\\_period\\_ending\\_10](https://www1.health.gov.au/internet/main/publishing.nsf/Content/C50CAE02452A48A7CA2587320081F7BF/$File/covid_19_australia_epidemiology_report_60_reporting_period_ending_10_april_2022.pdf)  
845 [\\_april\\_2022.pdf](https://www1.health.gov.au/internet/main/publishing.nsf/Content/C50CAE02452A48A7CA2587320081F7BF/$File/covid_19_australia_epidemiology_report_60_reporting_period_ending_10_april_2022.pdf)> (
- 846 66 Therneau T, A. B. *rpart: Recursive Partitioning and Regression Trees\_*. R package version 4.1.23,  
847 <<https://CRAN.R-project.org/package=rpart>> (2023).
- 848 67 Williams, G. J. Data mining with rattle and R: the art of excavating data for knowledge discovery.  
849 Series Use R!, Springer. (2011).
- 850 68 Lenth, R. *emmeans: Estimated Marginal Means, aka Least-Squares Means\_*. R package version  
851 1.10.0, (2024).

852

853

854

855 **Figure 1**

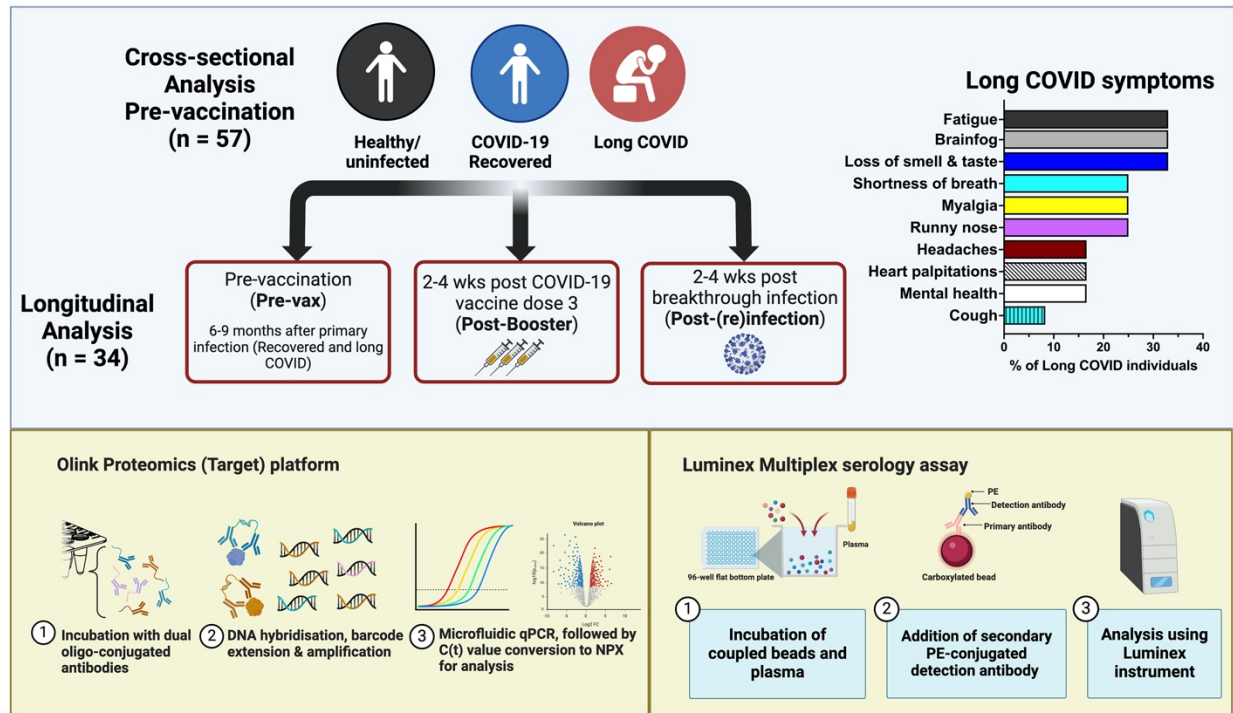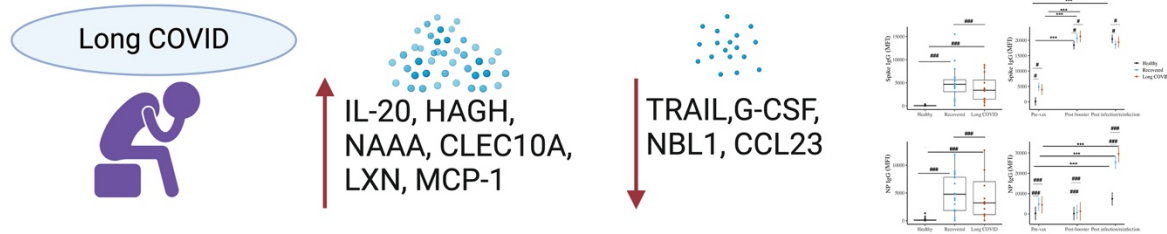

856

857

858 **Figure 2**

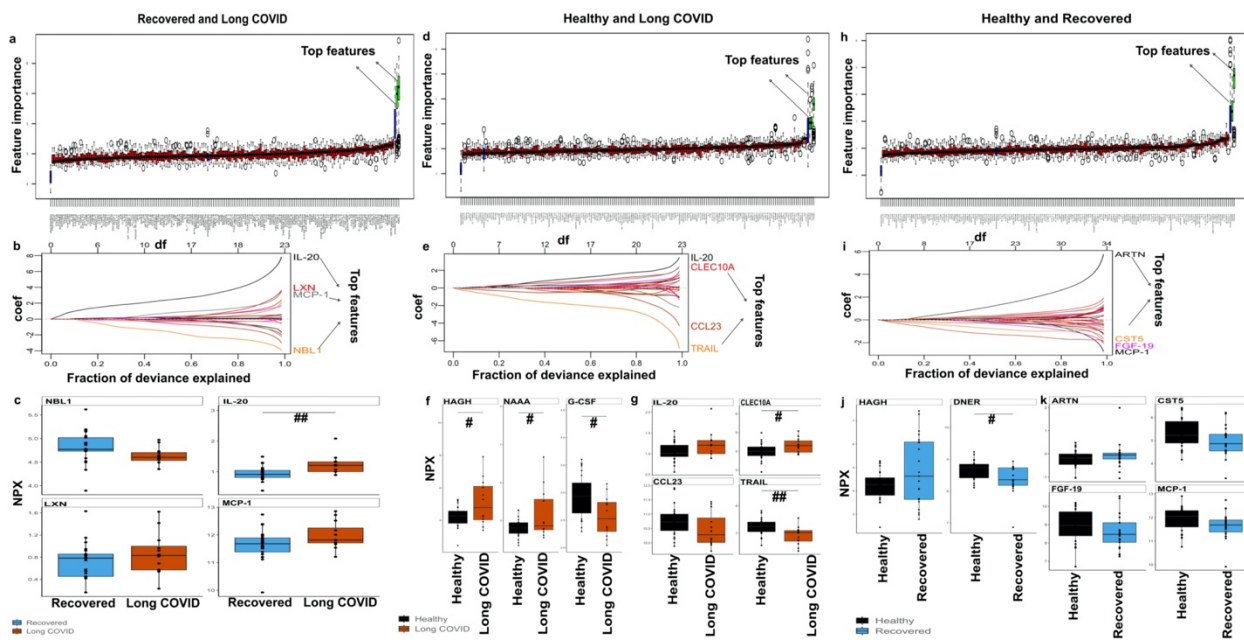

859

860

861 **Figure 3**

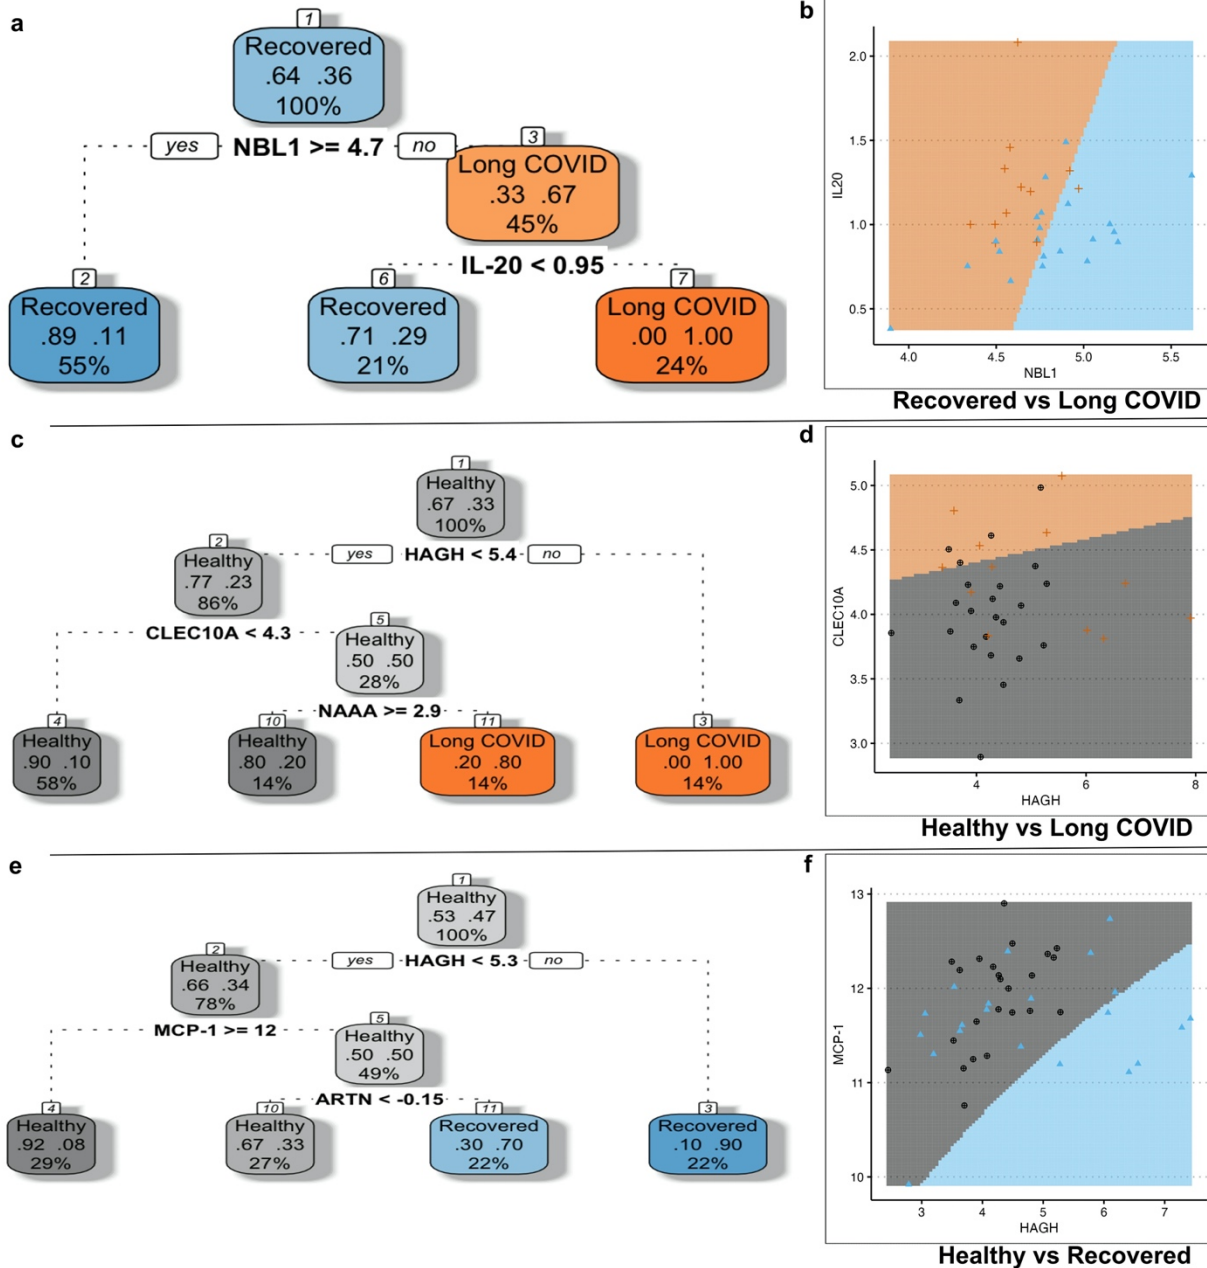

862

863



864 **Figure 4**

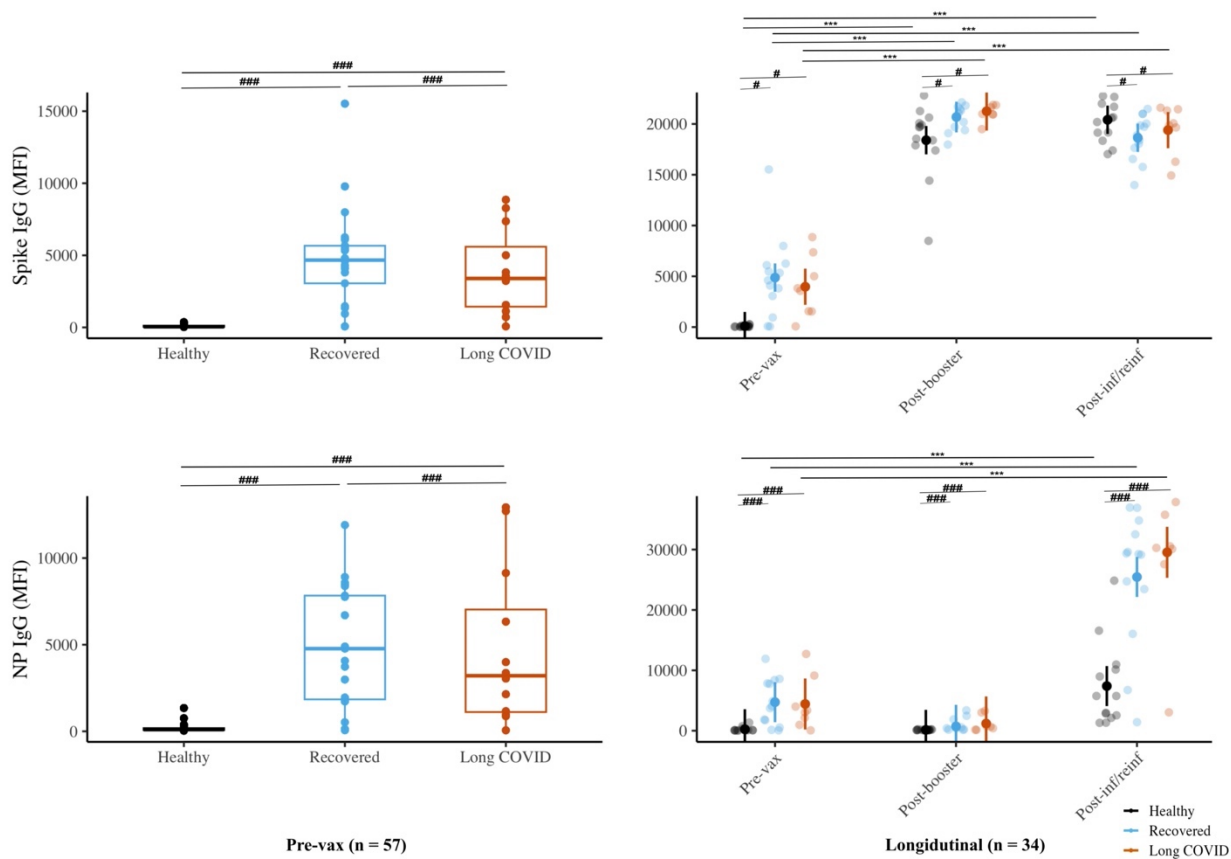

865

866

867 **Figure 5**

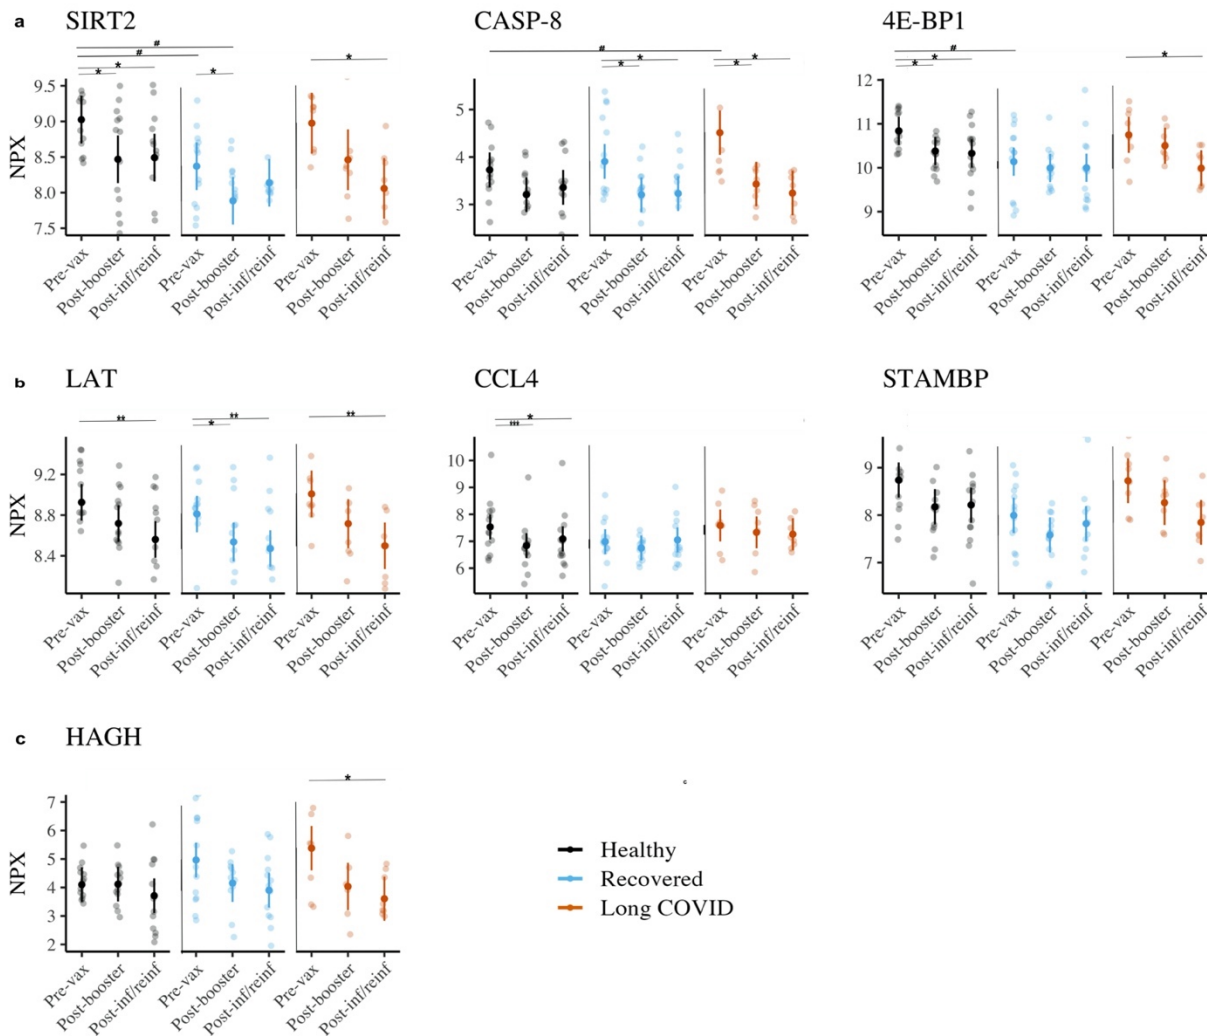

868

869

870

871 **Acknowledgements**

872 We wish to thank Anne Hart, Maureen Ford and all members of the COVID PROFILE  
873 consortium and the study participants in the COVID PROFILE study. We also wish to  
874 thank Imadh Azeez and Dr. Lauren Smith for valuable discussion and input around data  
875 analysis. Dr. Bansal received funding from the University of Bergen, The National  
876 Graduate School in Infection Biology and Antimicrobials (or IBA) and Pasteur legatet &  
877 Thjøtta's legat, University of Oslo, Norway [101563]. The COVID PROFILE study was  
878 supported by WHO Unity funds (2020/1085469-0), and WEHI philanthropic funds. I.M. is  
879 supported by an NHMRC Senior Research Fellowship (#1043345). This work was made  
880 possible through Victorian State Government Operational Infrastructure Support and  
881 Australian Government NHMRC IRIISS.

882

883 **Author contribution:**

884 SO and EME conceptualised the study. AB, SO, JC and EME performed the data  
885 analysis. SO, NWK and RM generated the data. AB, SO, NWK, RB and EME designed  
886 experimental work, AB, SO and EME wrote the first draft of the manuscript. RB, IM and  
887 RJC provided guidance and discussion and edited the manuscript.

888

889 **COVID PROFILE consortium members:** Emily M. Eriksson, Anne Hart, Maureen  
890 Forde, Siavash Foroughi, Nicholas Kiernan-Walker, Ramin Mazhari, Erin C. Lucas, Mai  
891 Margetts, Anthony Farchione, Dylan Sheerin, George Ashdown, Rachel Evans,  
892 Catherine Chen, Shazia Ruybal-Pesántez, Eamon Conway, Marilou H. Barrios, Jasper

893 Cornish, Maria Edmonds, Lee M. Henneken, Lisa J. Ioannidis, Sam W. Z. Olechnowicz,  
894 Ryan B. Munnings, Joanna R. Groom, Diana S. Hansen, Rory Bowden, Anna K.  
895 Coussens, Jason A. Tye-Din, Vanessa L. Bryant, Ivo Mueller

896

897 **Declaration of interests:** The authors declare no competing interests.

898

899 **Data and code availability:** To protect patient privacy, this study uses anonymised data  
900 from the COVID PROFILE study. Access to more data requires committee approval in  
901 Melbourne and will be provided by the corresponding author upon request. This paper  
902 does not report original code. This project leverages open-source R code. We have  
903 documented the specific R packages and functions used in relevant sections. Any  
904 additional information required to reanalyse the data reported in this paper is available  
905 from the lead contact upon reasonable request.

906
